# Supplementary material for: Relevance of the Mann Whitney Wilcoxon test in the survival analysis of newly established companies in Tunisia (Case of the sfax region)
Source: Springer Nature journal article supplement (doi:10.1186/s40497-018-0093-7), 2018-05-19
Supplement: MOESM1 [file 15777334]

Supplementary Material

We have number of sample, 52 entrepreneurs because we have eliminated 8 of entrepreneurs who have first year of creation their companies.

Table 1 : Test statistics Mann - Whitney Wilcoxon Test: variable «Activity area »

|                                     |         |
|-------------------------------------|---------|
| Mann-Whitney U                      | 290,000 |
| Wilcoxon W                          | 590,000 |
| Z                                   | 3,863   |
| Asymp. Sig. (2-tailed)              | ,088    |
| a. Grouping Variable: Activity area |         |

Table 2 :Test Statistics Mann-Whitney Wilcoxon Test

|                                       |         |
|---------------------------------------|---------|
| The survival of newly campany         |         |
| Mann-Whitney U                        | 299,000 |
| Wilcoxon W                            | 894,000 |
| Z                                     | -,138   |
| Asymp. Sig. (2-tailed)                | ,891    |
| a. Grouping Variable: product Quality |         |

Table 3:Test Statisticsa :Mann Whitney Wilcoxon Test

|                                            |         |
|--------------------------------------------|---------|
| The survival of newly campany              |         |
| Mann-Whitney U                             | 222,000 |
| Wilcoxon W                                 | 925,000 |
| Z                                          | 2,145   |
| Asymp. Sig. (2-tailed)                     | ,02     |
| a. Grouping Variable: Locale Establishment |         |

Table 4 :Test Statisticsa :Mann Whitney Wilcoxon Test

|                                               |         |
|-----------------------------------------------|---------|
| The survival of newly campany                 |         |
| Mann-Whitney U                                | 322,000 |
| Wilcoxon W                                    | 700,000 |
| Z                                             | -,039   |
| Asymp. Sig. (2-tailed)                        | ,969    |
| a. Grouping Variable: Regional implementation |         |

Table 5: Test Statistics : « Export »  
Mann-Whitney Wilcoxon

|                               |         |
|-------------------------------|---------|
| Mann-Whitney U                | 145,000 |
| Wilcoxon W                    | 173,000 |
| Z                             | -,252   |
| Asymp. Sig. (2-tailed)        | 6,801   |
| Exact Sig. [2*(1-tailedSig.)] | ,020    |
| a. Not corrected for ties.    |         |
| b. Grouping Variable: Export  |         |

Table 6 :Test Statistics

|                                 |         |
|---------------------------------|---------|
| The survival of newly campany   |         |
| Mann-Whitney U                  | 293,000 |
| Wilcoxon W                      | 728,000 |
| Z                               | -,506   |
| Asymp. Sig. (2-tailed)          | ,613    |
| a. Grouping Variable: customers |         |

Table 7 :Test Statistics :Mann Whitney Wilcoxon Test

|                                                             |         |
|-------------------------------------------------------------|---------|
| The survival of newly campany                               |         |
| Mann-Whitney U                                              | 270,000 |
| Wilcoxon W                                                  | 423,000 |
| Z                                                           | 7,548   |
| Asymp. Sig. (2-tailed)                                      | ,004    |
| a. Grouping Variable:Relationship with public adminstration |         |

Table 8 :Test Statistics :Mann Whitney  
Wilcoxon Test

|                                 |         |
|---------------------------------|---------|
| Mann-Whitney U                  | 221,500 |
| Wilcoxon W                      | 851,500 |
| Z                               | 5,215   |
| Asymp. Sig. (2-tailed)          | ,034    |
| a. Grouping Variable: Suppliers |         |

Table 9 :Test Statistics :Mann Whitney  
Wilcoxon Test

|                                 |         |
|---------------------------------|---------|
| Mann-Whitney U                  | 239,000 |
| Wilcoxon W                      | 834,000 |
| Z                               | 4,022   |
| Asymp. Sig. (2-tailed)          | ,027    |
| a. Grouping Variable: Employees |         |

Table 10 :Test Statisticsa :Mann-  
Whitney

|                                          |         |
|------------------------------------------|---------|
| Mann-Whitney U                           | 277,500 |
| Wilcoxon W                               | 907,500 |
| Z                                        | ,052    |
| Asymp. Sig. (2-tailed)                   | ,959    |
| a. Grouping Variable: competitive market |         |
